# Supplementary material
Source: PubMed Central journal article supplement (PMC9026766)
Supplement: NIHMS1795248-supplement-supplement.pdf [file NIHMS1795248-supplement-supplement.pdf]

# THE LANCET

## Haematology

### Supplementary appendix

This appendix formed part of the original submission and has been peer reviewed.  
We post it as supplied by the authors.

Supplement to: Leahy AB, Newman H, Li Y, et al. CD19-targeted chimeric antigen receptor T-cell therapy for CNS relapsed or refractory acute lymphocytic leukaemia: a post-hoc analysis of pooled data from five clinical trials. *Lancet Haematol* 2021; **8**: e711–22.

## **Appendix**

### **Supplemental Methods**

#### Outcomes

##### *Data sources:*

Patient demographics, baseline characteristics and adverse event (AE) reports for neurotoxicity and cytokine release syndrome (CRS) were obtained from the clinical trial databases. Patient clinical history, including prior radiation treatment, disease status at referral, and neurologic history, was manually abstracted from the medical record, including clinical trial referral and enrollment records. Medications administered following infusion and other post-infusion toxicity management was electronically abstracted from the electronic medical record.

##### *Serious adverse events:*

Adverse events were defined as serious when they were life-threatening or resulted in hospitalization or prolongation of hospitalization, congenital anomaly or disability (or required intervention to prevent), or death, or when considered an important medical event by the clinical investigator. Encephalopathy was considered an important medical event and reported as a serious adverse event on these trials.

#### **Supplement to Table 1: Demographics and baseline clinical characteristics of patients with CD19-positive acute lymphocytic leukaemia or lymphocytic lymphoma by stratum**

The CNS-negative stratum includes 22 patients for whom pre-infusion bone marrow evaluation and lumbar puncture was obtained at enrollment, 3-6 weeks prior to CAR T-cell infusion, and who received bridging chemotherapy in the interim. Disease status at evaluation is as follows: M2 bone marrow, n=4; M3, n=18; CNS1, n=21; CNS2, n=3.

The CNS-positive stratum includes 1 patient for whom pre-infusion bone marrow evaluation and lumbar puncture was obtained at enrollment, 3-6 weeks prior to CAR T-cell infusion, and who received bridging chemotherapy in the interim. Disease status at evaluation is as follows: M3 bone marrow, n=1; CNS, n=1.

**Appendix Table 1:** Inclusion, exclusion, and infusion criteria for patients with CNS disease by clinical trial.

|                                                                                                                                                                                                                                                                                                                                                                                                                                                                                                                                                                                                                                                                                                                                                                                                                                                                                                                                                                                                                                                                                                                                                                                                                                                                                                                                                                                                                                                                                                                                                                                                                                                                                                          |
|----------------------------------------------------------------------------------------------------------------------------------------------------------------------------------------------------------------------------------------------------------------------------------------------------------------------------------------------------------------------------------------------------------------------------------------------------------------------------------------------------------------------------------------------------------------------------------------------------------------------------------------------------------------------------------------------------------------------------------------------------------------------------------------------------------------------------------------------------------------------------------------------------------------------------------------------------------------------------------------------------------------------------------------------------------------------------------------------------------------------------------------------------------------------------------------------------------------------------------------------------------------------------------------------------------------------------------------------------------------------------------------------------------------------------------------------------------------------------------------------------------------------------------------------------------------------------------------------------------------------------------------------------------------------------------------------------------|
| <p><b>NCT01626495</b></p> <p><i>Initial protocol:</i><br/>Excluded patients with active CNS involvement with malignancy (i.e. CNS3 for ALL). Patients with prior CNS disease that has been effectively treated will be eligible. Routine CNS prophylaxis for ALL is permitted.</p> <p><i>After amendment:</i><br/>Patients with CNS3 disease will be eligible if CNS disease is responsive to therapy (at infusion, must meet infusion criteria)<br/>Excluded CNS3 disease that is progressive on therapy, or with CNS parenchymal lesions that might increase the risk of CNS toxicity</p> <p>CNS3 cohort infusion criteria:</p> <ol style="list-style-type: none"><li>1) Disease status:<ol style="list-style-type: none"><li>a. If CNS3 by spinal fluid involvement, stable/responding disease as indicated by:<ol style="list-style-type: none"><li>i. stable or decreasing CSF WBC, and</li><li>ii. total CSF WBC &lt; 100 in a sample obtained within 72 hours of CART-19 infusion.</li></ol></li><li>b. If CNS3 by MRI findings, there must be interval stability or improvement on MRI within 2 weeks of infusion</li><li>c. If CNS3 by cranial nerve findings, there must be stability or improvement of these cranial nerve findings on exam post intervention</li></ol></li><li>2) At least 21 days since any prior CNS3 patient was infused.</li><li>3) Patients with CNS3 disease requiring radiation therapy must be at least 8 weeks post radiation at CART-19 infusion</li><li>4) No acute/ongoing neurologic toxicity &gt; Grade 1 with the exception of a history of controlled seizures or fixed neurologic deficits that have been stable/improving over the past 3 months</li></ol> |
| <p><b>NCT02228096</b></p> <p>Excluded active CNS involvement by malignancy, defined as CNS-3 per NCCN guidelines. Note: Patients with history of CNS disease that has been effectively treated will be eligible</p>                                                                                                                                                                                                                                                                                                                                                                                                                                                                                                                                                                                                                                                                                                                                                                                                                                                                                                                                                                                                                                                                                                                                                                                                                                                                                                                                                                                                                                                                                      |
| <p><b>NCT02435849</b></p> <p>Excluded active CNS involvement by malignancy, defined as CNS-3 per NCCN guidelines. Note: Patients with history of CNS disease that has been effectively treated will be eligible</p>                                                                                                                                                                                                                                                                                                                                                                                                                                                                                                                                                                                                                                                                                                                                                                                                                                                                                                                                                                                                                                                                                                                                                                                                                                                                                                                                                                                                                                                                                      |
| <p><b>NCT02374333</b></p> <p>Patients with CNS3 disease will be eligible if CNS disease is responsive to therapy (at infusion, must meet infusion criteria)<br/>Excluded CNS3 disease that is progressive on therapy, or with CNS parenchymal lesions that might increase the risk of CNS toxicity</p> <p>Infusion criteria:</p> <ol style="list-style-type: none"><li>1) For patients with CNS3 disease, 8 weeks from cranial radiation therapy (if used) and stable or improving CNS disease by the following criteria as applicable:<ol style="list-style-type: none"><li>a. If CNS3 by spinal fluid involvement, CSF WBC count stable or decreasing and &lt;100 by lumbar puncture within 72 hours of infusion</li><li>b. If CNS3 by MRI findings, improvement in MRI findings within 2 weeks of infusion</li><li>c. If CNS3 by cranial nerve findings, stable or improving cranial nerve exam</li></ol></li><li>2) No acute/ongoing neurologic toxicity &gt; Grade 1 with the exception of controlled seizures or fixed neurologic deficits that have been stable/improving over the prior 3 months</li></ol>                                                                                                                                                                                                                                                                                                                                                                                                                                                                                                                                                                                       |
| <p><b>NCT02906371</b></p> <p>Patients with prior or current history of CNS3 disease will be eligible if CNS disease is responsive to therapy (at infusion, must meet criteria in Section 5.3)</p> <p>Excluded CNS3 disease that is progressive on therapy, or with CNS parenchymal lesions that might increase the risk of CNS toxicity.</p> <p>Infusion criteria:</p> <ol style="list-style-type: none"><li>1) Disease status:<ol style="list-style-type: none"><li>a. If CNS3 by spinal fluid involvement, stable/responding disease as indicated by:<ol style="list-style-type: none"><li>i. stable or decreasing CSF WBC, and</li><li>ii. total CSF WBC &lt; 100 in a sample obtained within 5 days of CART19 infusion.</li></ol></li></ol></li></ol>                                                                                                                                                                                                                                                                                                                                                                                                                                                                                                                                                                                                                                                                                                                                                                                                                                                                                                                                                |

- b. If CNS3 by MRI findings, there must be interval stability or improvement on MRI within 2 weeks of infusion
  - c. If CNS3 by cranial nerve findings, there must be stability or improvement of these cranial nerve findings on exam post intervention
- 2) Patients with CNS3 disease requiring radiation therapy must be at least 8 weeks post cranial radiation at CART19 infusion
  - 3) No acute/ongoing neurologic toxicity > Grade 1 with the exception of a history of controlled seizures or fixed neurologic deficits that have been stable/improving over the past 3 months

**Appendix Table 2: Univariate Cox regression for relapse free and overall survival.**

|                                             | <i>Relapse free survival</i> |             |         | <i>Overall survival</i> |              |         |
|---------------------------------------------|------------------------------|-------------|---------|-------------------------|--------------|---------|
|                                             | HR                           | 95% CI      | p value | HR                      | 95% CI       | p value |
| <b>Age</b>                                  |                              |             |         |                         |              |         |
| 3-9.99y                                     | REF                          | REF         | REF     | REF                     | REF          | REF     |
| <3y                                         | 1.328                        | 0.468-3.768 | 0.59    | 1.400                   | 0.494-3.968  | 0.53    |
| 10-17.99y                                   | 0.639                        | 0.379-1.076 | 0.092   | 0.423                   | 0.241-0.741  | 0.0027  |
| ≥18y                                        | 0.629                        | 0.308-1.284 | 0.20    | 0.477                   | 0.229-0.996  | 0.049   |
| <b>Male</b>                                 | REF                          | REF         | REF     | REF                     | REF          | REF     |
| <b>Female</b>                               | 1.781                        | 1.114-2.848 | 0.016   | 1.728                   | 1.064-2.807  | 0.027   |
| <b>No history of seizure</b>                | REF                          | REF         | REF     | REF                     | REF          | REF     |
| <b>Seizure</b>                              | 0.953                        | 0.501-1.814 | 0.88    | 1.403                   | 0.751- 2.623 | 0.29    |
| <b>No history of stroke</b>                 | REF                          | REF         | REF     | REF                     | REF          | REF     |
| <b>Stroke</b>                               | 0.475                        | 0.066-3.417 | 0.46    | 1.180                   | 0.289-4.824  | 0.82    |
| <b>No history of methotrexate toxicity</b>  | REF                          | REF         | REF     | REF                     | REF          | REF     |
| <b>Methotrexate toxicity</b>                | 0.720                        | 0.290-1.789 | 0.48    | 0.321                   | 0.078-1.311  | 0.11    |
| <b>No prior HSCT</b>                        | REF                          | REF         | REF     | REF                     | REF          | REF     |
| <b>Prior HSCT</b>                           | 1.053                        | 0.659-1.682 | 0.83    | 1.060                   | 0.654-1.718  | 0.81    |
| <b>No history of brain radiation</b>        | REF                          | REF         | REF     | REF                     | REF          | REF     |
| <b>Brain radiation</b>                      | 0.548                        | 0.317-0.948 | 0.031   | 0.548                   | 0.299-1.007  | 0.053   |
| <b>No history of total body irradiation</b> | REF                          | REF         | REF     | REF                     | REF          | REF     |
| <b>Total body irradiation</b>               | 1.087                        | 0.682-1.732 | 0.73    | 1.141                   | 0.704-1.851  | 0.59    |
| <b>CNS1 at infusion</b>                     | REF                          | REF         | REF     | REF                     | REF          | REF     |
| <b>CNS2 or 3 at infusion</b>                | 2.060                        | 1.083-3.920 | 0.028   | 2.095                   | 1.068-4.111  | 0.032   |
| <b>All others</b>                           | 0.665                        | REF         | REF     | REF                     | REF          | REF     |
| <b>Isolated CNS</b>                         |                              | 0.380-1.163 | 0.15    | 0.496                   | 0.245- 1.001 | 0.050   |
| <b>CNS-negative stratum</b>                 | REF                          | REF         | REF     | REF                     | REF          | REF     |
| <b>CNSr/r stratum</b>                       | 0.847                        | 0.523-1.370 | 0.50    | 0.796                   | 0.471- 1.346 | 0.40    |
| <b>CTL019</b>                               | REF                          | REF         | REF     | REF                     | REF          | REF     |
| <b>HuCART19</b>                             | 0.659                        | 0.361-1.204 | 0.18    | 0.474                   | 0.226-0.993  | 0.048   |
| <b>Bone marrow disease at infusion</b>      |                              |             |         |                         |              |         |
| <0.01%                                      | REF                          | REF         | REF     | REF                     | REF          | REF     |
| 0.01-4.99%                                  | 1.748                        | 0.793-3.852 | 0.17    | 2.022                   | 0.798-5.124  | 0.14    |
| 5-25%                                       | 1.037                        | 0.354-3.036 | 0.95    | 1.989                   | 0.680-5.820  | 0.21    |
| >25%                                        | 4.515                        | 2.606-7.824 | <.0001  | 6.541                   | 3.281-13.037 | <.0001  |

**Appendix Table 3: Multivariate Cox regression model for relapse free and overall survival.**

|                                         | <i>Relapse free survival</i> |              |         | <i>Overall survival</i> |              |         |
|-----------------------------------------|------------------------------|--------------|---------|-------------------------|--------------|---------|
|                                         | HR                           | 95% CI       | p value | HR                      | 95% CI       | p value |
| <b>Age*</b>                             |                              |              |         |                         |              |         |
| 3-9.99y                                 | REF                          | REF          | REF     | REF                     | REF          | REF     |
| <3y                                     | 1.439                        | 0.468-4.424  | 0.53    | 1.860                   | 0.627-5.519  | 0.26    |
| 10-17.99y                               | 0.654                        | 0.386-1.110  | 0.12    | 0.496                   | 0.280-0.880  | 0.016   |
| ≥18y                                    | 0.456                        | 0.211-0.987  | 0.046   | 0.452                   | 0.209-0.976  | 0.043   |
| <b>Male</b>                             | REF                          | REF          | REF     | REF                     | REF          | REF     |
| <b>Female*</b>                          | 1.145                        | 0.693-1.892  | 0.60    | 1.148                   | 0.682-1.933  | 0.60    |
| <b>No history of brain radiation</b>    | REF                          | REF          | REF     | REF                     | REF          | REF     |
| <b>Brain radiation*</b>                 | 0.600                        | 0.320-1.123  | 0.11    | 0.632                   | 0.318-1.258  | 0.19    |
| <b>CNS1 at infusion</b>                 | REF                          | REF          | REF     | REF                     | REF          | REF     |
| <b>CNS2 or 3 at infusion*</b>           | 1.703                        | 0.816-3.556  | 0.16    | 1.437                   | 0.681-3.033  | 0.34    |
| <b>CNS-negative stratum</b>             | REF                          | REF          | REF     | REF                     | REF          | REF     |
| <b>CNSr/r stratum<sup>§</sup></b>       | 1.674                        | 0.912-3.074  | 0.10    | 1.806                   | 0.947-3.444  | 0.073   |
| <b>CTL019</b>                           | REF                          | REF          | REF     | REF                     | REF          | REF     |
| <b>HuCART19*</b>                        | &                            | &            | &       | 0.703                   | 0.322-1.535  | 0.38    |
| <b>Bone marrow disease at infusion*</b> |                              |              |         |                         |              |         |
| <0.01%                                  | REF                          | REF          | REF     | REF                     | REF          | REF     |
| M1: 0.01-4.99%                          | 2.141                        | 0.925-4.956  | 0.076   | 2.720                   | 1.016-7.281  | 0.046   |
| M2: 5-25%                               | 1.356                        | 0.432-4.255  | 0.88    | 2.571                   | 0.805-8.210  | 0.11    |
| M3: >25%                                | 5.354                        | 2.778-10.321 | <.0001  | 6.972                   | 3.088-15.742 | <.0001  |

\*p<0.1 in univariate analysis

<sup>§</sup>Variable of clinical interest

& p>0.1 in univariate analysis, not included in multivariate model

**Appendix Table 4: Post-infusion toxicity medication management.**

|                                         | CNS-negative<br>(n=129) | CNSr/r<br>(n=66) | p value |
|-----------------------------------------|-------------------------|------------------|---------|
| Received tocilizumab, n(%)              | 27 (21%)                | 8 (21%)          | 0.20    |
| Received steroids                       | 20 (16%)                | 7 (11%)          | 0.50    |
| Dexamethasone                           | 4 (3.1%)                | 2 (3.0%)         | >0.9    |
| Hydrocortisone                          | 11 (8.5%)               | 6 (9.1%)         | >0.9    |
| Methylprednisone                        | 11 (8.5%)               | 4 (6.1%)         | 0.70    |
| Received anti-epileptic (AE) medication |                         |                  |         |
| Rescue benzodiazepine, n(%)             | 4 (3.1%)                | 2 (3.0%)         | >0.9    |
| Received treatment dose AE, n(%)        | 8 (6.2%)                | 5 (7.6%)         | 0.80    |
| Levetiracetam (Keppra), n               | 7                       | 4                | §       |
| Phenytoin (Dilantin), n                 | 1                       | 0                | §       |
| Lacosamide (Vimpat), n                  | 3                       | 1                | §       |
| Phenobarbital, n                        | 1                       | 0                | §       |
| Other, n                                | 2                       | 2                | §       |

§ Not applicable

**Appendix Table 5: Time to SAE analysis.**

|                   | n  | CNS-negative, n = 129            |                             | CNSr/r, n = 66                   |                             | p value       |          |
|-------------------|----|----------------------------------|-----------------------------|----------------------------------|-----------------------------|---------------|----------|
|                   |    | Time to onset, d<br>Median (IQR) | Duration, d<br>Median (IQR) | Time to onset, d<br>Median (IQR) | Duration, d<br>Median (IQR) | Time to onset | Duration |
| Encephalopathy    | 39 | 6 (4.8-9.2)                      | 6 (4-11)                    | 5 (5-6)                          | 4 (3-6)                     | 0.58          | 0.19     |
| Seizure           | 15 | 9 (8.2-12.2)                     | §                           | 6 (5-11)                         | §                           | 0.54          | §        |
| Movement disorder | 1  | §                                | §                           | 18                               | 2                           | §             | §        |
| Speech impairment | 1  | §                                | §                           | 8                                | 1                           | §             | §        |

§ Not applicable

**Appendix Table 6: Univariate logistic regression for neurotoxicity.**

|                                      | Any neurotoxicity |              |         | Grade 3 or 4 neurotoxicity |                 |         |
|--------------------------------------|-------------------|--------------|---------|----------------------------|-----------------|---------|
|                                      | OR                | 95% CI       | p value | OR                         | 95% CI          | p value |
| Age                                  |                   |              |         |                            |                 |         |
| 3-9.99y                              | REF               | REF          | REF     | REF                        | REF             | REF     |
| <3y                                  | 0.480             | 0.107-2.162  | 0.62    | <0.001                     | <0.001->999.999 | 0.96    |
| 10-17.99y                            | 0.567             | 0.299-1.074  | 0.68    | 0.863                      | 0.323-2.308     | 0.98    |
| ≥18y                                 | 0.589             | 0.256-1.355  | 0.83    | 1.250                      | 0.384-4.070     | 0.96    |
| Male                                 | REF               | REF          | REF     | REF                        | REF             | REF     |
| Female                               | 1.216             | 0.689-2.145  | 0.50    | 0.995                      | 0.414-2.393     | 0.99    |
| No neurologic comorbidity            | REF               | REF          | REF     | REF                        | REF             | REF     |
| Neurologic comorbidity               | 1.711             | 0.859-3.411  | 0.13    | 2.708                      | 1.080-6.791     | 0.034   |
| No seizure                           | REF               | REF          | REF     | REF                        | REF             | REF     |
| Seizure                              | 1.669             | 0.724-3.846  | 0.23    | 1.435                      | 0.447-4.613     | 0.54    |
| No stroke                            | REF               | REF          | REF     | REF                        | REF             | REF     |
| Stroke                               | 3.511             | 0.359-34.363 | 0.28    | 2.561                      | 0.255-25.705    | 0.42    |
| No methotrexate toxicity             | REF               | REF          | REF     | REF                        | REF             | REF     |
| Methotrexate toxicity                | 1.000             | 0.348-2.874  | 1.00    | 1.165                      | 0.246-5.525     | 0.85    |
| No neurologic deficit                | REF               | REF          | REF     | REF                        | REF             | REF     |
| Neurologic deficit                   | 1.908             | 0.601-6.056  | 0.27    | 2.430                      | 0.617-9.576     | 0.20    |
| No prior HSCT                        | REF               | REF          | REF     | REF                        | REF             | REF     |
| Prior HSCT                           | 0.789             | 0.449-1.387  | 0.41    | 1.460                      | 0.608-3.511     | 0.40    |
| No history of brain radiation        | REF               | REF          | REF     | REF                        | REF             | REF     |
| Brain radiation                      | 1.732             | 0.916-3.274  | 0.090   | 0.939                      | 0.349-2.524     | 0.90    |
| No history of total body irradiation | REF               | REF          | REF     | REF                        | REF             | REF     |
| Total body irradiation               | 0.864             | 0.489-1.527  | 0.62    | 1.552                      | 0.649-3.714     | 0.32    |
| CNS1 at infusion                     | REF               | REF          | REF     | REF                        | REF             | REF     |
| CNS2 or 3 at infusion                | 1.905             | 0.706-5.142  | 0.20    | 0.415                      | 0.053-3.270     | 0.40    |
| All others                           | REF               | REF          | REF     | REF                        | REF             | REF     |
| Isolated CNS                         | 1.603             | 0.810-3.169  | 0.18    | 0.495                      | 0.140-1.752     | 0.28    |
| CNS-negative stratum                 | REF               | REF          | REF     | REF                        | REF             | REF     |
| CNSr/r stratum                       | 1.946             | 1.067-3.550  | 0.030   | 1.048                      | 0.420-2.616     | 0.92    |
| CTL019                               | REF               | REF          | REF     | REF                        | REF             | REF     |
| HuCART19                             | 0.766             | 0.381-1.538  | 0.45    | 0.529                      | 0.149-1.876     | 0.32    |
| Bone marrow disease at infusion      |                   |              |         |                            |                 |         |
| <0.01%                               | REF               | REF          | REF     | REF                        | REF             | REF     |
| 0.01-4.99%                           | 0.870             | 0.356-2.129  | 0.085   | 1.690                      | 0.268-10.664    | 0.78    |
| 5-25%                                | 2.393             | 0.858-6.680  | 0.22    | 1.315                      | 0.129-13.399    | 0.60    |
| >25%                                 | 2.581             | 1.324-5.032  | 0.030   | 7.315                      | 2.040-26.228    | 0.0014  |

**Appendix Table 7:** Multivariate logistic regression models for neurotoxicity outcomes: (1) any neurotoxicity, (2) grade 3/4 neurotoxicity.

|                                            | OR     | 95% CI       | p value |
|--------------------------------------------|--------|--------------|---------|
| <b>Any neurotoxicity</b>                   |        |              |         |
| <b>No history of brain radiation</b>       | REF    | REF          | REF     |
| <b>Brain radiation*</b>                    | 1.504  | 0.669-3.382  | 0.32    |
| <b>CNS1 at infusion</b>                    | REF    | REF          | REF     |
| <b>CNS2 or 3 at infusion<sup>§</sup></b>   | 1.266  | 0.430-3.730  | 0.67    |
| <b>CNS-negative stratum</b>                | REF    | REF          | REF     |
| <b>CNSr/r stratum*</b>                     | 3.420  | 1.440-8.121  | 0.0053  |
| <b>No neurologic comorbidity</b>           | REF    | REF          | REF     |
| <b>Neurologic comorbidity<sup>§#</sup></b> | 1.572  | 0.729-3.391  | 0.25    |
| <b>Bone marrow disease at infusion*</b>    |        |              |         |
| <0.01%                                     | REF    | REF          | REF     |
| M1: 0.01-4.99%                             | 1.450  | 0.529-3.976  | 0.094   |
| M2: 5-25%                                  | 5.458  | 1.658-17.970 | 0.063   |
| M3: >25%                                   | 5.720  | 2.415-13.546 | 0.0033  |
| <b>Grade 3 or 4 neurotoxicity</b>          |        |              |         |
| <b>CNS1 at infusion</b>                    | REF    | REF          | REF     |
| <b>CNS2 or 3 at infusion<sup>§</sup></b>   | 0.195  | 0.021-1.827  | 0.15    |
| <b>CNS-negative stratum</b>                | REF    | REF          | REF     |
| <b>CNSr/r stratum<sup>§</sup></b>          | 2.382  | 0.758-7.488  | 0.14    |
| <b>No neurologic comorbidity</b>           | REF    | REF          | REF     |
| <b>Neurologic comorbidity<sup>§#</sup></b> | 4.152  | 1.430-12.051 | 0.0088  |
| <b>Bone marrow disease ≤25%</b>            | REF    | REF          | REF     |
| <b>Bone marrow disease &gt;25%**</b>       | 11.785 | 3.603-38.544 | <0.001  |

\*p<0.1 in univariate analysis

<sup>§</sup>Variable of clinical interest

\*Categories were combined due to small numbers

<sup>#</sup>Composite variable combining history of stroke, seizure, methotrexate toxicity and neurologic deficit

**Appendix Table 8: Univariate logistic regression model for seizure**

|                                             | OR    | 95% CI       | p value |
|---------------------------------------------|-------|--------------|---------|
| <b>Age</b>                                  |       |              |         |
| 3-9-99yo                                    | REF   | REF          | REF     |
| <3yo                                        | .     | .            | .       |
| 10-17-99yo                                  | 0.878 | 0.293-2.637  | 0.95    |
| ≥18yo                                       | 0.290 | 0.034-2.460  | 0.97    |
| <b>Male</b>                                 | REF   | REF          | REF     |
| <b>Female</b>                               | 0.852 | 0.291-2.495  | 0.77    |
| <b>No history of seizure</b>                | REF   | REF          | REF     |
| <b>Seizure</b>                              | 2.612 | 0.765-8.920  | 0.13    |
| <b>No history of stroke</b>                 | REF   | REF          | REF     |
| <b>Stroke</b>                               | 4.214 | 0.411-43.213 | 0.23    |
| <b>No history of methotrexate toxicity</b>  | REF   | REF          | REF     |
| <b>Methotrexate toxicity</b>                | 5.587 | 1.528-20.433 | 0.0093  |
| <b>No history of neurologic deficit</b>     | REF   | REF          | REF     |
| <b>Neurologic deficit</b>                   | 4.250 | 1.031-17.527 | 0.045   |
| <b>No history of neurologic comorbidity</b> | REF   | REF          | REF     |
| <b>Neurologic comorbidity</b>               | 6.682 | 2.225-20.070 | 0.0007  |
| <b>No prior HSCT</b>                        | REF   | REF          | REF     |
| <b>Prior HSCT</b>                           | 0.935 | 0.325-2.688  | 0.90    |
| <b>No history of brain radiation</b>        | REF   | REF          | REF     |
| <b>Brain radiation</b>                      | 1.375 | 0.447-4.228  | 0.58    |
| <b>No history of total body irradiation</b> | REF   | REF          | REF     |
| <b>Total body irradiation</b>               | 1.197 | 0.416-3.444  | 0.11    |
| <b>CNS1 at infusion</b>                     | REF   | REF          | REF     |
| <b>CNS2 or 3 at infusion</b>                | .     | .            | .       |
| <b>All others</b>                           | REF   | REF          | REF     |
| <b>Isolated CNS</b>                         | 0.522 | 0.113-2.406  | 0.40    |
| <b>CNS-negative stratum</b>                 | REF   | REF          | REF     |
| <b>CNSr/r stratum</b>                       | 0.975 | 0.319-2.981  | 0.97    |
| <b>CTL019</b>                               | REF   | REF          | REF     |
| <b>HuCART19</b>                             | 2.000 | 0.644-6.216  | 0.23    |
| <b>Bone marrow disease at infusion</b>      |       |              |         |
| <0.01%                                      | REF   | REF          | REF     |
| 0.01-4.99%                                  | 0.604 | 0.065-5.633  | 0.29    |
| 5-25%                                       | 3.282 | 0.668-16.133 | 0.13    |
| >25%                                        | 1.885 | 0.527-6.738  | 0.49    |

. Sample size too small

**Appendix Table 9: Frequency table of association between CRS and any neurotoxicity.**

|                     | Grade | No neurotoxicity<br>n = 104 | Any neurotoxicity<br>n = 91 | Grade 0, 1, or 2<br>neurotoxicity<br>n = 172 | Grade 3 or 4<br>neurotoxicity<br>n = 23 |
|---------------------|-------|-----------------------------|-----------------------------|----------------------------------------------|-----------------------------------------|
| <b>CRS</b><br>n (%) | 0     | 25 (24%)                    | 7 (7.7%)                    | 32 (19%)                                     | 0                                       |
|                     | 1     | 13 (13%)                    | 1 (1.1%)                    | 14 (8.1%)                                    | 0                                       |
|                     | 2     | 56 (54%)                    | 43 (47%)                    | 97 (56%)                                     | 2 (8.7%)                                |
|                     | 3     | 7 (6.7%)                    | 18 (20%)                    | 19 (11%)                                     | 6 (26%)                                 |
|                     | 4     | 3 (2.9%)                    | 22 (24%)                    | 10 (5.8%)                                    | 15 (65%)                                |
